# Supplementary material for: A high-temperature multiaxial precision time-delayed dielectric switch crystal triggered by linear/propeller/ball three-form motion
Source: Royal Society of Chemistry journal article supplement (doi:10.1039/c8tc06228e), 2019-01-01
Supplement: c8tc06228e1.pdf [file c8tc06228e1.pdf]

## Supporting Information

### **A high-temperature multiaxial precision time-delayed dielectric switch crystal triggered by linear/propeller/ball three forms motion**

Qing Wang, Yu-Wei Zhang, Wan-Ying Zhang, Ping-Ping Shi, Qiong

Ye\*<sup>[a]</sup>, Da-Wei Fu\*<sup>[a]</sup>

*(Ordered Matter Science Research Center, Jiangsu Key Laboratory for Science and  
Applications of Molecular Ferroelectrics, Southeast University, Nanjing, 211189, P.R.  
China)*

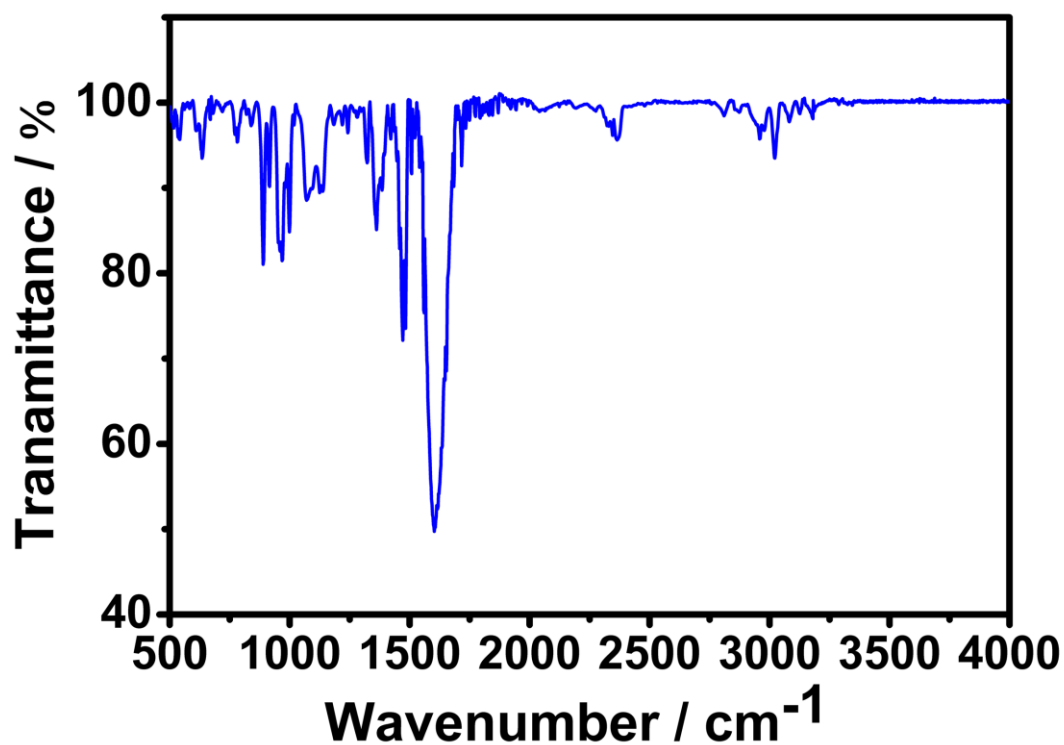

**Fig. S1.** Infrared spectrum of  $(\text{TMAA})_3\text{-Bi}_2\text{Cl}_9$  in KBr pellets was recorded on a Shimadzu model IR-60 spectrometer at room temperature.

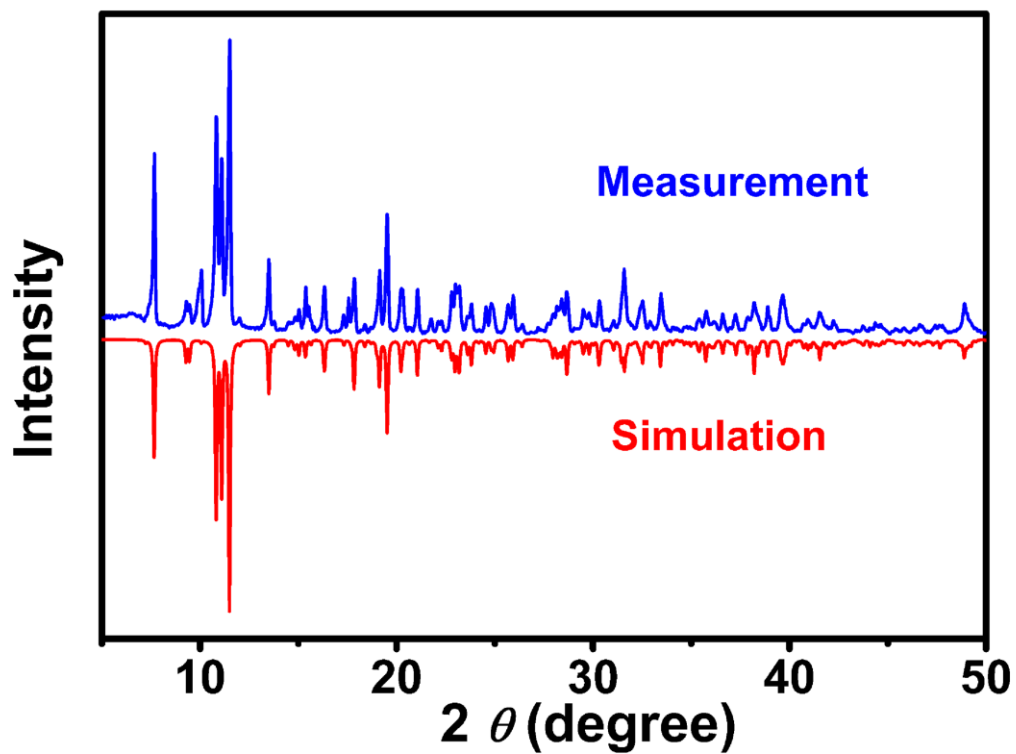

Fig. S2. Powder X-ray diffraction patterns (PXRD) of  $(\text{TMAA})_3\text{-Bi}_2\text{Cl}_9$  at room temperature.

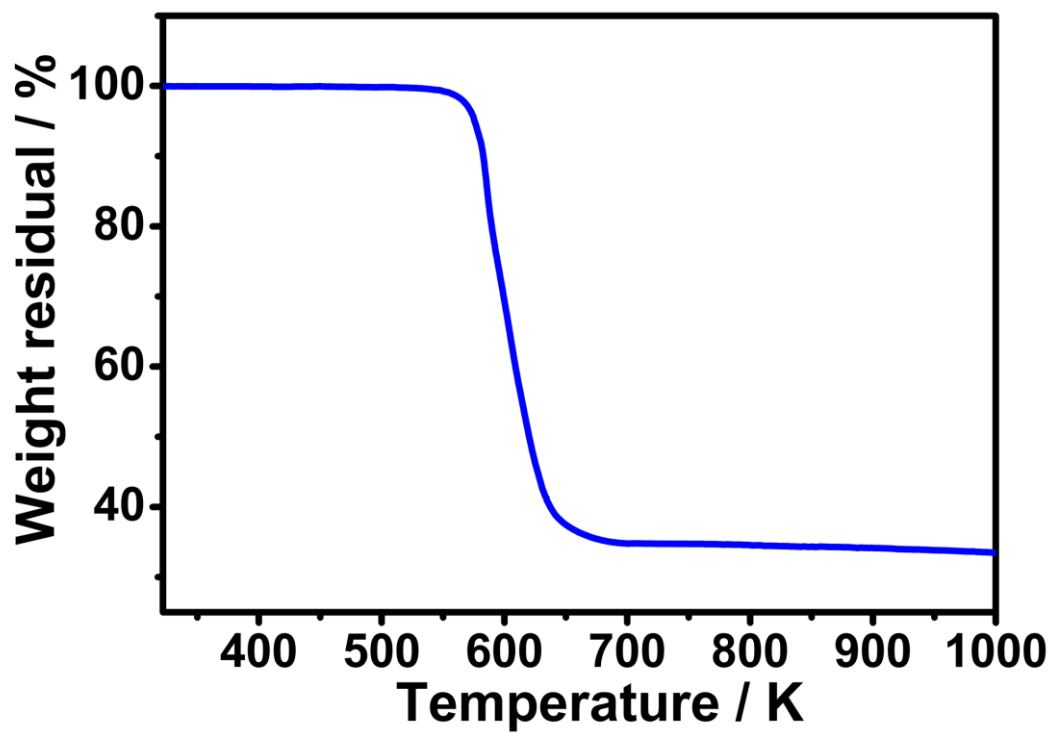

Fig. S3. TGA curves for  $(\text{TMAA})_3\text{-Bi}_2\text{Cl}_9$ .

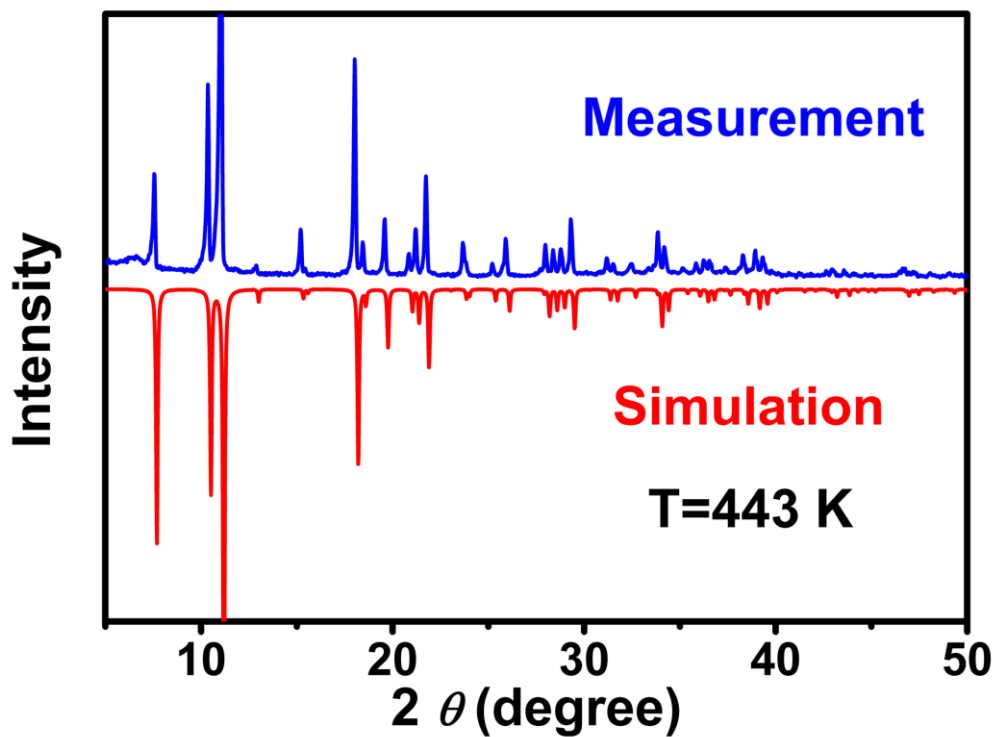

Fig. S4 Experimental variable-temperature PXR D patterns measured at 443 K of  $(\text{TMAA})_3\text{-Bi}_2\text{Cl}_9$  match well with the simulated ones.

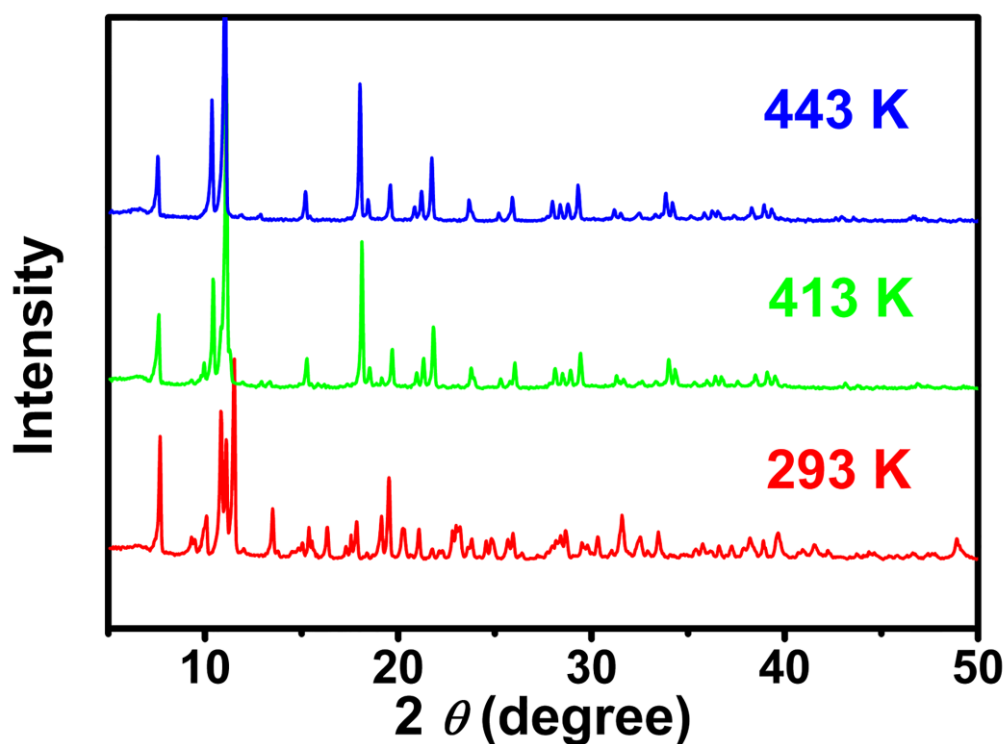

Fig. S5 Variable-temperature PXR D patterns of  $(\text{TMAA})_3\text{-Bi}_2\text{Cl}_9$ .

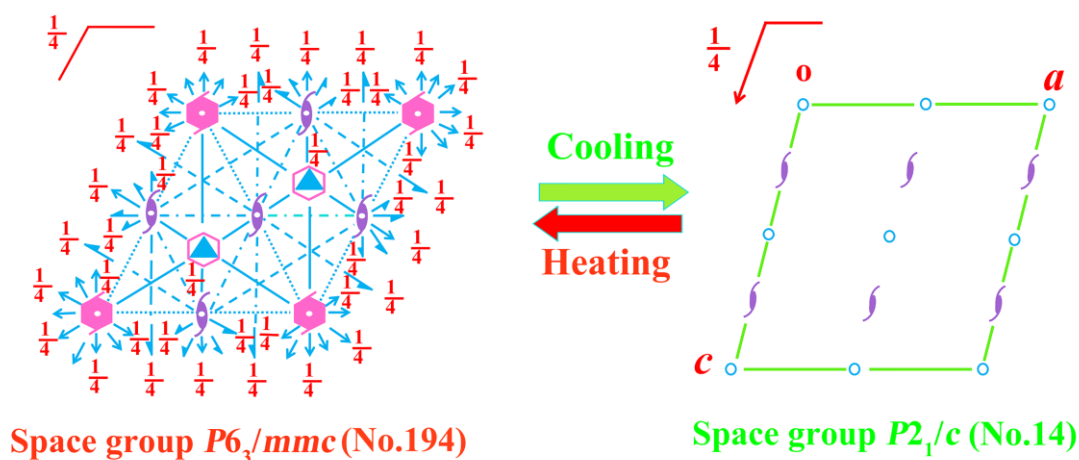

**Fig. S6** The symmetry breaking of  $(\text{TMAA})_3\text{-Bi}_2\text{Cl}_9$  from HTP to RTP.

**Table S1** The crystallographic data and structure refinements of  $[\text{TMAA}]_3[\text{Bi}_2\text{Cl}_9]$  at 293 K and 443 K

| Temperature       | RTP (293K)                                | HTP (443K)                                          |
|-------------------|-------------------------------------------|-----------------------------------------------------|
| Empirical formula | $[\text{TMAA}]_3[\text{Bi}_2\text{Cl}_9]$ | $[\text{C}_{15}\text{N}_3][\text{Bi}_2\text{Cl}_9]$ |
| Formula weight    | 1037.56                                   | 945.3                                               |
| Crystal system    | Monoclinic                                | Hexagonal                                           |
| Space group       | $P2_1/c$                                  | $P6_3/mmc$                                          |
| $a / \text{\AA}$  | 12.1075(6)                                | 9.7795(9)                                           |
| $b / \text{\AA}$  | 15.9308(7)                                | 9.7795(9)                                           |
| $c / \text{\AA}$  | 20.0007(14)                               | 23.197(5)                                           |
| $\alpha / ^\circ$ | 90.00                                     | 90.00                                               |
| $\beta / ^\circ$  | 107.869(5)                                | 90.00                                               |
| $\gamma / ^\circ$ | 90.00                                     | 120.00                                              |

|                        |           |           |
|------------------------|-----------|-----------|
| $V / \text{\AA}^3$     | 3671.7(4) | 1921.3(5) |
| $Z$                    | 4         | 2         |
| $F(000)$               | 1960      | 916.0     |
| Reflns measured        | 19012     | 7909      |
| Independent reflns     | 6195      | 692       |
| Reflns used            | 12082     | 809       |
| GOF                    | 1.129     | 1.026     |
| $R_1[I > 2\sigma(I)]$  | 0.0443    | 0.1328    |
| $wR_2[I > 2\sigma(I)]$ | 0.1339    | 0.3818    |

**Table S2** Bond lengths [ $\text{\AA}$ ] for  $[\text{TMAA}]_3[\text{Bi}_2\text{Cl}_9]$  at 293 K and 443 K

| 293 K  |            | 443 K                |             |
|--------|------------|----------------------|-------------|
| N1—C2  | 1.482 (3)  | N1—C2 <sup>i</sup>   | 1.3002 (16) |
| N1—C3  | 1.432 (11) | N1—C2                | 1.3002 (16) |
| N1—C1  | 1.444 (11) | N1—C1 <sup>i</sup>   | 1.500 (2)   |
| N1—C4  | 1.506 (8)  | N1—C1 <sup>ii</sup>  | 1.500 (2)   |
| C1—H1A | 0.9600     | N1—C1                | 1.500 (2)   |
| C1—H1B | 0.9600     | C1—C2 <sup>i</sup>   | 1.985 (2)   |
| C1—H1C | 0.9600     | C1—C2                | 1.985 (2)   |
| C2—H2A | 0.9600     | C2—C3                | 1.300 (2)   |
| C2—H2B | 0.9600     | C2—C1 <sup>i</sup>   | 1.985 (2)   |
| C2—H2C | 0.9600     | C2—C1 <sup>ii</sup>  | 1.985 (2)   |
| C3—H3A | 0.9600     | C4—C3                | 1.300 (3)   |
| C3—H3B | 0.9600     | N2—C6 <sup>iii</sup> | 1.4000 (13) |
| C3—H3C | 0.9600     | N2—C6                | 1.4000 (13) |
| C4—C5  | 1.498 (4)  | N2—C5 <sup>iv</sup>  | 1.500 (3)   |
| C4—H4A | 0.9700     | N2—C5 <sup>iii</sup> | 1.500 (3)   |
| C4—H4B | 0.9700     | N2—C5 <sup>v</sup>   | 1.500 (3)   |
| C5—C6  | 1.328 (14) | N2—C5 <sup>vi</sup>  | 1.500 (3)   |
| C5—H5  | 0.9300     | N2—C5                | 1.500 (3)   |
| C6—H6A | 0.9300     | N2—C5 <sup>vii</sup> | 1.500 (3)   |
| C6—H6B | 0.9300     | C5—C5 <sup>iv</sup>  | 1.268 (10)  |
| N2—C7  | 1.484 (4)  | C5—C5 <sup>vii</sup> | 1.720 (6)   |

---

|          |             |                         |           |
|----------|-------------|-------------------------|-----------|
| N2—C9    | 1.402 (8)   | C6—C7                   | 1.300 (2) |
| N2—C8    | 1.423 (11)  | C7—C8                   | 1.300 (3) |
| N2—C10   | 1.496 (9)   | Bi1—C12 <sup>viii</sup> | 2.50 (3)  |
| C7—H7A   | 0.9600      | Bi1—C12 <sup>ix</sup>   | 2.50 (3)  |
| C7—H7B   | 0.9600      | Bi1—C12                 | 2.50 (3)  |
| C7—H7C   | 0.9600      | Bi1—C11 <sup>ix</sup>   | 2.806 (4) |
| C8—H8A   | 0.9600      | Bi1—C11                 | 2.806 (4) |
| C8—H8B   | 0.9600      | Bi1—C11 <sup>x</sup>    | 2.806 (4) |
| C8—H8C   | 0.9600      | C11—Bi1 <sup>x</sup>    | 2.806 (4) |
| C9—H9A   | 0.9600      |                         |           |
| C9—H9B   | 0.9600      |                         |           |
| C9—H9C   | 0.9600      |                         |           |
| C10—C11  | 1.508 (4)   |                         |           |
| C10—H10A | 0.9700      |                         |           |
| C10—H10B | 0.9700      |                         |           |
| C11—C12  | 1.374 (4)   |                         |           |
| C11—H11  | 0.9300      |                         |           |
| C12—H12A | 0.9300      |                         |           |
| C12—H12B | 0.9300      |                         |           |
| N3—C13   | 1.468 (6)   |                         |           |
| N3—C16   | 1.472 (7)   |                         |           |
| N3—C15   | 1.482 (8)   |                         |           |
| N3—C14   | 1.503 (5)   |                         |           |
| C13—H13A | 0.9600      |                         |           |
| C13—H13B | 0.9600      |                         |           |
| C13—H13C | 0.9600      |                         |           |
| C14—H14A | 0.9600      |                         |           |
| C14—H14B | 0.9600      |                         |           |
| C14—H14C | 0.9600      |                         |           |
| C15—H15A | 0.9600      |                         |           |
| C15—H15B | 0.9600      |                         |           |
| C15—H15C | 0.9600      |                         |           |
| C16—C17  | 1.578 (10)  |                         |           |
| C16—H16A | 0.9700      |                         |           |
| C16—H16B | 0.9700      |                         |           |
| C17—C18  | 1.246 (12)  |                         |           |
| C17—H17  | 0.9300      |                         |           |
| C18—H18A | 0.9300      |                         |           |
| C18—H18B | 0.9300      |                         |           |
| Bi1—C18  | 2.5647 (15) |                         |           |
| Bi1—C16  | 2.5675 (15) |                         |           |
| Bi1—C17  | 2.5761 (14) |                         |           |
| Bi1—C14  | 2.8747 (13) |                         |           |
| Bi1—C19  | 2.8947 (15) |                         |           |

---

|         |             |
|---------|-------------|
| Bi1—C15 | 2.9108 (13) |
| Bi2—C13 | 2.5594 (15) |
| Bi2—C12 | 2.5684 (17) |
| Bi2—C11 | 2.5771 (15) |
| Bi2—C15 | 2.8936 (15) |
| Bi2—C19 | 2.9002 (13) |
| Bi2—C14 | 2.9268 (13) |

**Table S3** Bond angles [°] for [TMAA]<sub>3</sub>[Bi<sub>2</sub>Cl<sub>9</sub>] at 293 and 443 K

| 293 K      |           | 443 K                                   |             |
|------------|-----------|-----------------------------------------|-------------|
| C2—N1—C3   | 102.5 (6) | C2 <sup>i</sup> —N1—C2                  | 180.0       |
| C2—N1—C1   | 116.4 (6) | C2 <sup>i</sup> —N1—C1 <sup>i</sup>     | 90.0        |
| C3—N1—C1   | 110.0 (7) | C2—N1—C1 <sup>i</sup>                   | 90.0        |
| C2—N1—C4   | 117.4 (5) | C2 <sup>i</sup> —N1—C1 <sup>ii</sup>    | 90.000 (1)  |
| C3—N1—C4   | 89.3 (4)  | C2—N1—C1 <sup>ii</sup>                  | 90.000 (1)  |
| C1—N1—C4   | 116.1 (7) | C1 <sup>i</sup> —N1—C1 <sup>ii</sup>    | 120.000 (1) |
| N1—C1—H1A  | 109.5     | C2 <sup>i</sup> —N1—C1                  | 90.0        |
| N1—C1—H1B  | 109.5     | C2—N1—C1                                | 90.000 (1)  |
| H1A—C1—H1B | 109.5     | C1 <sup>i</sup> —N1—C1                  | 120.0       |
| N1—C1—H1C  | 109.5     | C1 <sup>ii</sup> —N1—C1                 | 120.0       |
| H1A—C1—H1C | 109.5     | N1—C1—C2 <sup>i</sup>                   | 40.91 (5)   |
| H1B—C1—H1C | 109.5     | N1—C1—C2                                | 40.91 (5)   |
| N1—C2—H2A  | 109.5     | C2 <sup>i</sup> —C1—C2                  | 81.83 (11)  |
| N1—C2—H2B  | 109.5     | C3—C2—N1                                | 180.0       |
| H2A—C2—H2B | 109.5     | C3—C2—C1 <sup>i</sup>                   | 130.91 (5)  |
| N1—C2—H2C  | 109.5     | N1—C2—C1 <sup>i</sup>                   | 49.09 (5)   |
| H2A—C2—H2C | 109.5     | C3—C2—C1 <sup>ii</sup>                  | 130.91 (5)  |
| H2B—C2—H2C | 109.5     | N1—C2—C1 <sup>ii</sup>                  | 49.09 (5)   |
| N1—C3—H3A  | 109.5     | C1 <sup>i</sup> —C2—C1 <sup>ii</sup>    | 81.76 (8)   |
| N1—C3—H3B  | 109.5     | C3—C2—C1                                | 130.91 (5)  |
| H3A—C3—H3B | 109.5     | N1—C2—C1                                | 49.09 (5)   |
| N1—C3—H3C  | 109.5     | C1 <sup>i</sup> —C2—C1                  | 81.76 (8)   |
| H3A—C3—H3C | 109.5     | C1 <sup>ii</sup> —C2—C1                 | 81.76 (8)   |
| H3B—C3—H3C | 109.5     | C4—C3—C2                                | 180.0       |
| C5—C4—N1   | 95.5 (5)  | C6 <sup>iii</sup> —N2—C6                | 180.0       |
| C5—C4—H4A  | 112.6     | C6 <sup>iii</sup> —N2—C5 <sup>iv</sup>  | 90.000 (2)  |
| N1—C4—H4A  | 112.7     | C6—N2—C5 <sup>iv</sup>                  | 90.000 (2)  |
| C5—C4—H4B  | 112.7     | C6 <sup>iii</sup> —N2—C5 <sup>iii</sup> | 90.000 (2)  |
| N1—C4—H4B  | 112.7     | C6—N2—C5 <sup>iii</sup>                 | 90.000 (2)  |
| H4A—C4—H4B | 110.1     | C5 <sup>iv</sup> —N2—C5 <sup>iii</sup>  | 70.0 (4)    |
| C6—C5—C4   | 108.0 (9) | C6 <sup>iii</sup> —N2—C5 <sup>v</sup>   | 90.0        |

|               |           |                                            |             |
|---------------|-----------|--------------------------------------------|-------------|
| C6—C5—H5      | 126.0     | C6—N2—C5 <sup>v</sup>                      | 90.0        |
| C4—C5—H5      | 126.0     | C5 <sup>iv</sup> —N2—C5 <sup>v</sup>       | 120.000 (3) |
| C5—C6—H6A     | 120.0     | C5 <sup>iii</sup> —N2—C5 <sup>v</sup>      | 50.0 (4)    |
| C5—C6—H6B     | 120.0     | C6 <sup>iii</sup> —N2—C5 <sup>vi</sup>     | 90.000 (2)  |
| H6A—C6—H6B    | 120.0     | C6—N2—C5 <sup>vi</sup>                     | 90.000 (2)  |
| C7—N2—C9      | 122.9 (6) | C5 <sup>iv</sup> —N2—C5 <sup>vi</sup>      | 170.0 (4)   |
| C7—N2—C8      | 113.7 (7) | C5 <sup>iii</sup> —N2—C5 <sup>vi</sup>     | 120.000 (1) |
| C9—N2—C8      | 118.4 (7) | C5 <sup>v</sup> —N2—C5 <sup>vi</sup>       | 70.0 (4)    |
| C7—N2—C10     | 95.7 (5)  | C6 <sup>iii</sup> —N2—C5                   | 90.000 (1)  |
| C9—N2—C10     | 98.1 (5)  | C6—N2—C5                                   | 90.000 (1)  |
| C8—N2—C10     | 98.8 (7)  | C5 <sup>iv</sup> —N2—C5                    | 50.0 (4)    |
| N2—C7—H7A     | 109.5     | C5 <sup>iii</sup> —N2—C5                   | 120.000 (1) |
| N2—C7—H7B     | 109.5     | C5 <sup>v</sup> —N2—C5                     | 170.0 (4)   |
| H7A—C7—H7B    | 109.5     | C5 <sup>vi</sup> —N2—C5                    | 120.000 (2) |
| N2—C7—H7C     | 109.5     | C6 <sup>iii</sup> —N2—C5 <sup>vii</sup>    | 90.000 (1)  |
| H7A—C7—H7C    | 109.5     | C6—N2—C5 <sup>vii</sup>                    | 90.000 (1)  |
| H7B—C7—H7C    | 109.5     | C5 <sup>iv</sup> —N2—C5 <sup>vii</sup>     | 120.0       |
| N2—C8—H8A     | 109.5     | C5 <sup>iii</sup> —N2—C5 <sup>vii</sup>    | 170.0 (4)   |
| N2—C8—H8B     | 109.5     | C5 <sup>v</sup> —N2—C5 <sup>vii</sup>      | 120.000 (1) |
| H8A—C8—H8B    | 109.5     | C5 <sup>vi</sup> —N2—C5 <sup>vii</sup>     | 50.0 (4)    |
| N2—C8—H8C     | 109.5     | C5—N2—C5 <sup>vii</sup>                    | 70.0 (4)    |
| H12A—C12—H12B | 120.0     | C5 <sup>iv</sup> —C5—N2                    | 64.99 (18)  |
| C13—N3—C16    | 104.7 (5) | C5 <sup>iv</sup> —C5—C5 <sup>vii</sup>     | 120.0       |
| C13—N3—C15    | 110.6 (5) | N2—C5—C5 <sup>vii</sup>                    | 55.01 (18)  |
| C16—N3—C15    | 110.4 (5) | C7—C6—N2                                   | 180.0       |
| C13—N3—C14    | 110.9 (4) | C6—C7—C8                                   | 180.000 (1) |
| C16—N3—C14    | 110.7 (4) | C12 <sup>viii</sup> —Bi1—C12 <sup>ix</sup> | 94.7 (7)    |
| C15—N3—C14    | 109.4 (5) | C12 <sup>viii</sup> —Bi1—C12               | 94.7 (7)    |
| N3—C13—H13A   | 109.5     | C12 <sup>ix</sup> —Bi1—C12                 | 94.7 (7)    |
| N3—C13—H13B   | 109.5     | C12 <sup>viii</sup> —Bi1—C11 <sup>ix</sup> | 92.7 (4)    |
| H13A—C13—H13B | 109.5     | C12 <sup>ix</sup> —Bi1—C11 <sup>ix</sup>   | 169.0 (5)   |
| N3—C13—H13C   | 109.5     | C12—Bi1—C11 <sup>ix</sup>                  | 92.7 (4)    |
| H13A—C13—H13C | 109.5     | C12 <sup>viii</sup> —Bi1—C11               | 92.7 (4)    |
| H13B—C13—H13C | 109.5     | C12 <sup>ix</sup> —Bi1—C11                 | 92.7 (4)    |
| N3—C14—H14A   | 109.5     | C12—Bi1—C11                                | 169.0 (5)   |
| N3—C14—H14B   | 109.5     | C11 <sup>ix</sup> —Bi1—C11                 | 78.83 (14)  |
| H14A—C14—H14B | 109.5     | C12 <sup>viii</sup> —Bi1—C11 <sup>x</sup>  | 169.0 (5)   |
| N3—C14—H14C   | 109.5     | C12 <sup>ix</sup> —Bi1—C11 <sup>x</sup>    | 92.7 (4)    |
| H14A—C14—H14C | 109.5     | C12—Bi1—C11 <sup>x</sup>                   | 92.7 (4)    |
| H14B—C14—H14C | 109.5     | C11 <sup>ix</sup> —Bi1—C11 <sup>x</sup>    | 78.83 (14)  |
| N3—C15—H15A   | 109.5     | C11—Bi1—C11 <sup>x</sup>                   | 78.83 (14)  |
| N3—C15—H15B   | 109.5     | Bi1 <sup>x</sup> —C11—Bi1                  | 85.70 (18)  |
| H15A—C15—H15B | 109.5     | C2—N1—C1—C2 <sup>i</sup>                   | 180.0       |
| N3—C15—H15C   | 109.5     | C1 <sup>i</sup> —N1—C1—C2 <sup>i</sup>     | -90.0       |



|               |            |                                            |            |
|---------------|------------|--------------------------------------------|------------|
| H15A—C15—H15C | 109.5      | C1 <sup>ii</sup> —N1—C1—C2 <sup>i</sup>    | 90.0       |
| H15B—C15—H15C | 109.5      | C2 <sup>i</sup> —N1—C1—C2                  | 180.0      |
| N3—C16—C17    | 109.6 (6)  | C1 <sup>i</sup> —N1—C1—C2                  | 90.0       |
| N3—C16—H16A   | 109.7      | C1 <sup>ii</sup> —N1—C1—C2                 | -90.0      |
| C17—C16—H16A  | 109.7      | C2 <sup>i</sup> —N1—C2—C3                  | 0(49)      |
| N3—C16—H16B   | 109.7      | C1 <sup>i</sup> —N1—C2—C3                  | -120 (65)  |
| C17—C16—H16B  | 109.7      | C1 <sup>ii</sup> —N1—C2—C3                 | 120 (40)   |
| H16A—C16—H16B | 108.2      | C1—N1—C2—C3                                | 0(40)      |
| C18—C17—C16   | 122.0 (8)  | C2 <sup>i</sup> —N1—C2—C1 <sup>i</sup>     | 59 (44)    |
| C18—C17—H17   | 119.0      | C1 <sup>ii</sup> —N1—C2—C1 <sup>i</sup>    | -120.0     |
| C16—C17—H17   | 119.0      | C1—N1—C2—C1 <sup>i</sup>                   | 120.0      |
| C17—C18—H18A  | 120.0      | C2 <sup>i</sup> —N1—C2—C1 <sup>ii</sup>    | 179 (44)   |
| C17—C18—H18B  | 120.0      | C1 <sup>i</sup> —N1—C2—C1 <sup>ii</sup>    | 120.0      |
| H18A—C18—H18B | 120.0      | C1—N1—C2—C1 <sup>ii</sup>                  | -120.0     |
| C18—Bi1—C16   | 93.62 (6)  | C2 <sup>i</sup> —N1—C2—C1                  | -61 (55)   |
| C18—Bi1—C17   | 93.49 (5)  | C1 <sup>i</sup> —N1—C2—C1                  | -120.0     |
| C16—Bi1—C17   | 93.89 (5)  | C1 <sup>ii</sup> —N1—C2—C1                 | 120.0      |
| C18—Bi1—C14   | 93.80 (4)  | N1—C1—C2—C3                                | 180.0      |
| C16—Bi1—C14   | 91.41 (5)  | C2 <sup>i</sup> —C1—C2—C3                  | 180.0      |
| C17—Bi1—C14   | 170.70 (4) | C2 <sup>i</sup> —C1—C2—N1                  | 0.0        |
| C18—Bi1—C19   | 172.35 (4) | N1—C1—C2—C1 <sup>i</sup>                   | -41.40 (3) |
| C16—Bi1—C19   | 92.45 (5)  | C2 <sup>i</sup> —C1—C2—C1 <sup>i</sup>     | -41.40 (3) |
| C17—Bi1—C19   | 90.74 (5)  | N1—C1—C2—C1 <sup>ii</sup>                  | 41.40 (3)  |
| C14—Bi1—C19   | 81.39 (4)  | C2 <sup>i</sup> —C1—C2—C1 <sup>ii</sup>    | 41.40 (3)  |
| C18—Bi1—C15   | 93.92 (5)  | N1—C2—C3—C4                                | 0(51)      |
| C16—Bi1—C15   | 169.80 (5) | C1 <sup>i</sup> —C2—C3—C4                  | 0(47)      |
| C17—Bi1—C15   | 92.48 (4)  | C1 <sup>ii</sup> —C2—C3—C4                 | 0(61)      |
| C14—Bi1—C15   | 81.25 (4)  | C1—C2—C3—C4                                | 0(57)      |
| C19—Bi1—C15   | 79.51 (4)  | C6 <sup>iii</sup> —N2—C5—C5 <sup>iv</sup>  | 90.0       |
| H8A—C8—H8C    | 109.5      | C6—N2—C5—C5 <sup>iv</sup>                  | -90.0      |
| H8B—C8—H8C    | 109.5      | C5 <sup>iii</sup> —N2—C5—C5 <sup>iv</sup>  | 0.0        |
| N2—C9—H9A     | 109.5      | C5 <sup>v</sup> —N2—C5—C5 <sup>iv</sup>    | 0.0        |
| N2—C9—H9B     | 109.5      | C5 <sup>vi</sup> —N2—C5—C5 <sup>iv</sup>   | 180.0      |
| H9A—C9—H9B    | 109.5      | C5 <sup>vii</sup> —N2—C5—C5 <sup>iv</sup>  | 180.0      |
| N2—C9—H9C     | 109.5      | C6 <sup>iii</sup> —N2—C5—C5 <sup>vii</sup> | -90.0      |
| H9A—C9—H9C    | 109.5      | C6—N2—C5—C5 <sup>vii</sup>                 | 90.0       |
| H9B—C9—H9C    | 109.5      | C5 <sup>iv</sup> —N2—C5—C5 <sup>vii</sup>  | 180.0      |
| N2—C10—C11    | 103.0 (4)  | C5 <sup>iii</sup> —N2—C5—C5 <sup>vii</sup> | 180.0      |
| N2—C10—H10A   | 111.2      | C5 <sup>v</sup> —N2—C5—C5 <sup>vii</sup>   | 180.0      |
| C11—C10—H10A  | 111.2      | C5 <sup>vi</sup> —N2—C5—C5 <sup>vii</sup>  | 0.0        |
| N2—C10—H10B   | 111.2      | C6 <sup>iii</sup> —N2—C6—C7                | 0(40)      |
| C11—C10—H10B  | 111.2      | C5 <sup>iv</sup> —N2—C6—C7                 | -178 (56)  |
| H10A—C10—H10B | 109.1      | C5 <sup>iii</sup> —N2—C6—C7                | 112 (44)   |
| C12—C11—C10   | 147.6 (6)  | C5 <sup>v</sup> —N2—C6—C7                  | 62 (44)    |

---

|                 |             |                                               |            |
|-----------------|-------------|-----------------------------------------------|------------|
| C12—C11—H11     | 106.2       | C5 <sup>vi</sup> —N2—C6—C7                    | -8(44)     |
| C10—C11—H11     | 106.2       | C5—N2—C6—C7                                   | -128 (56)  |
| C11—C12—H12A    | 120.0       | C5 <sup>vii</sup> —N2—C6—C7                   | -58 (56)   |
| C11—C12—H12B    | 120.0       | N2—C6—C7—C8                                   | 0(49)      |
| C13—Bi2—C12     | 94.16 (6)   | C12 <sup>viii</sup> —Bi1—C11—Bi1 <sup>x</sup> | 132.6 (3)  |
| C13—Bi2—C11     | 92.78 (5)   | C12 <sup>ix</sup> —Bi1—C11—Bi1 <sup>x</sup>   | -132.6 (3) |
| C12—Bi2—C11     | 95.25 (6)   | C12—Bi1—C11—Bi1 <sup>x</sup>                  | 0.000 (7)  |
| C13—Bi2—C15     | 91.23 (5)   | C11 <sup>ix</sup> —Bi1—C11—Bi1 <sup>x</sup>   | 40.33 (5)  |
| C12—Bi2—C15     | 169.01 (4)  | C11 <sup>x</sup> —Bi1—C11—Bi1 <sup>x</sup>    | -40.33 (5) |
| C11—Bi2—C15     | 94.05 (5)   |                                               |            |
| C13—Bi2—C19     | 93.22 (4)   |                                               |            |
| C12—Bi2—C19     | 90.42 (5)   |                                               |            |
| C11—Bi2—C19     | 171.43 (5)  |                                               |            |
| C15—Bi2—C19     | 79.71 (4)   |                                               |            |
| C13—Bi2—C14     | 170.44 (5)  |                                               |            |
| C12—Bi2—C14     | 93.02 (5)   |                                               |            |
| C11—Bi2—C14     | 92.84 (5)   |                                               |            |
| C15—Bi2—C14     | 80.67 (4)   |                                               |            |
| C19—Bi2—C14     | 80.42 (4)   |                                               |            |
| Bi1—C14—Bi2     | 83.48 (4)   |                                               |            |
| Bi2—C15—Bi1     | 83.43 (4)   |                                               |            |
| Bi1—C19—Bi2     | 83.60 (4)   |                                               |            |
| C2—N1—C4—C5     | 50.1 (8)    |                                               |            |
| C3—N1—C4—C5     | 153.9 (5)   |                                               |            |
| C1—N1—C4—C5     | -94.1 (8)   |                                               |            |
| N1—C4—C5—C6     | -162.6 (9)  |                                               |            |
| C7—N2—C10—C11   | -155.6 (5)  |                                               |            |
| C9—N2—C10—C11   | -31.1 (6)   |                                               |            |
| C8—N2—C10—C11   | 89.4 (6)    |                                               |            |
| N2—C10—C11—C12  | 102.3 (10)  |                                               |            |
| C13—N3—C16—C17  | -50.4 (7)   |                                               |            |
| C15—N3—C16—C17  | 68.7 (8)    |                                               |            |
| C14—N3—C16—C17  | -169.9 (6)  |                                               |            |
| N3—C16—C17—C18  | 125.0 (9)   |                                               |            |
| C18—Bi1—C14—Bi2 | 133.65 (4)  |                                               |            |
| C16—Bi1—C14—Bi2 | -132.62 (5) |                                               |            |
| C17—Bi1—C14—Bi2 | -7.8 (3)    |                                               |            |
| C19—Bi1—C14—Bi2 | -40.36 (4)  |                                               |            |
| C15—Bi1—C14—Bi2 | 40.26 (4)   |                                               |            |
| C13—Bi2—C14—Bi1 | -8.3 (3)    |                                               |            |
| C12—Bi2—C14—Bi1 | 130.32 (5)  |                                               |            |
| C11—Bi2—C14—Bi1 | -134.27 (5) |                                               |            |
| C15—Bi2—C14—Bi1 | -40.63 (4)  |                                               |            |
| C19—Bi2—C14—Bi1 | 40.40 (4)   |                                               |            |

---

---

|                 |             |
|-----------------|-------------|
| C13—Bi2—C15—Bi1 | -134.88 (4) |
| C12—Bi2—C15—Bi1 | -15.5 (3)   |
| C11—Bi2—C15—Bi1 | 132.25 (5)  |
| C19—Bi2—C15—Bi1 | -41.83 (4)  |
| C14—Bi2—C15—Bi1 | 40.03 (4)   |
| C18—Bi1—C15—Bi2 | -134.07 (4) |
| C16—Bi1—C15—Bi2 | 3.6 (3)     |
| C17—Bi1—C15—Bi2 | 132.26 (5)  |
| C14—Bi1—C15—Bi2 | -40.83 (4)  |
| C19—Bi1—C15—Bi2 | 41.96 (4)   |
| C18—Bi1—C19—Bi2 | -10.6 (4)   |
| C16—Bi1—C19—Bi2 | 131.86 (4)  |
| C17—Bi1—C19—Bi2 | -134.22 (4) |
| C14—Bi1—C19—Bi2 | 40.80 (4)   |
| C15—Bi1—C19—Bi2 | -41.83 (4)  |
| C13—Bi2—C19—Bi1 | 132.77 (5)  |
| C12—Bi2—C19—Bi1 | -133.04 (5) |
| C11—Bi2—C19—Bi1 | -1.5 (3)    |
| C15—Bi2—C19—Bi1 | 42.10 (4)   |
| C14—Bi2—C19—Bi1 | -40.05 (4)  |

---

Symmetry codes: (i)  $-x+y$ ,  $-x+1$ ,  $-z+1/2$ ; (ii)  $-y+1$ ,  $x-y+1$ ,  $z$ ; (iii)  $-x+y+1$ ,  $-x+2$ ,  $-z+1/2$ ; (iv)  $-x+y+1$ ,  $y$ ,  $z$ ; (v)  $x$ ,  $x-y+1$ ,  $-z+1/2$ ; (vi)  $-y+2$ ,  $x-y+1$ ,  $z$ ; (vii)  $-y+2$ ,  $-x+2$ ,  $-z+1/2$ ; (viii)  $-x+y+1$ ,  $-x+1$ ,  $z$ ; (ix)  $-y+1$ ,  $x-y$ ,  $z$ ; (x)  $-x+y+1$ ,  $-x+1$ ,  $-z+1/2$ .
